# Supplementary material
Source: PubMed Central journal article supplement (PMC6836698)
Supplement: jppt_24_6_Schwartz_Table_S1.pdf [file jppt_24_6_Schwartz_Table_S1.pdf]

**Table S1.** Sensitivity Analysis, Adjusted Relative Risks, and 95% CI for the Association Between Receipt of 1 or More PPI or H<sub>2</sub> Blocker Prescriptions and Pediatric-Onset IBD <1 Year and >1 Year to 2 Years Prior to Diagnosis

| Time Prior to Diagnosis | Cases*<br>n = 285, No. (%) | Controls*<br>n = 1142, No. (%) | Odds Ratio (95% CI) <sup>†</sup> |
|-------------------------|----------------------------|--------------------------------|----------------------------------|
| <1 yr                   |                            |                                |                                  |
| PPIs                    | 69 (24.2)                  | 5 (0.4)                        | 89.4 (28.0–285.5)                |
| H <sub>2</sub> blockers | 24 (8.4)                   | 15 (1.3)                       | 4.8 (2.4–9.8)                    |
| >1 yr–2 yr              |                            |                                |                                  |
| PPIs                    | 11 (3.9)                   | 4 (0.4)                        | 12.4 (3.6–43.1)                  |
| H <sub>2</sub> blockers | 4 (1.4)                    | 8 (0.7)                        | 0.8 (0.2–3.5)                    |

IBD, inflammatory bowel disease; PPI, proton pump inhibitor

\* n (%).

<sup>†</sup> Adjusted for disease risk score.
