# Supplementary material
Source: PubMed Central journal article supplement (PMC6836698)
Supplement: jppt_24_6_Schwartz_Table_S2.pdf [file jppt_24_6_Schwartz_Table_S2.pdf]

**Table S2.** Clinical Indications, Symptoms, and Additional Prescriptions Among 9 Study Subjects Prescribed H<sub>2</sub> Blockers, Kaiser Permanente Northern California, 1996–2016

| Case or Control | Additional Prescriptions*                                                                                                | Diagnosis                             | Gastrointestinal Symptoms                               | Non-gastrointestinal Symptoms    | Primary Reason for Visit                 |
|-----------------|--------------------------------------------------------------------------------------------------------------------------|---------------------------------------|---------------------------------------------------------|----------------------------------|------------------------------------------|
| Control         | Norgestimate-ethinyl estradiol                                                                                           | Iron deficiency                       | Abdominal pain, nausea                                  | Fatigue                          | Well-child visit                         |
| Control         | Ondansetron, mupirocin, azithromycin                                                                                     | Vomiting, indigestion                 | Abdominal pain, vomiting                                | Congestion, cough                | Abdominal pain, vomiting 1–6/day         |
| Control         | Montelukast, polyethylene glycol 3350                                                                                    | GERD                                  | Abdominal pain, constipation, hard stools               | Chest pain                       | Nausea, chest pain                       |
| Control         | Fluticasone                                                                                                              | Hoarseness                            | None                                                    | Patient clears throat constantly | Reflux                                   |
| Control         | Sertraline, aripiprazole, albuterol, quetiapine, dextroamphetamine and levoamphetamine, levonorgestrel-ethinyl estradiol | Vomiting, GERD differential diagnosis | Vomiting                                                | Headache, low iron               | Vomiting and headache                    |
| Case            | Diphenhydramine, lidocaine, nystatin oral suspension, norinyl, hydrocodone-acetaminophen, polyethylene glycol 3350       | Gastroenteritis, herpangina           | Diarrhea, vomiting                                      | Fever, oral sores                | Gastroenteritis                          |
| Case            | Azithromycin                                                                                                             | Postinfectious gastritis/enteropathy  | Diarrhea, abdominal pain, nausea, constipation at times | Leg pain                         | Gastritis/enteropathy                    |
| Case            | Trimethoprim-sulfamethoxazole, prednisone, cephalexin, amoxicillin                                                       | Folliculitis                          | None                                                    | Rash around right ear, leg       | Rash on right side of face, folliculitis |
| Case            | None                                                                                                                     | Pancreatitis, anemia                  | Abdominal pain                                          | None                             | Abdominal pain, acute pancreatitis       |

GERD, gastroesophageal reflux disease

\* Additional prescriptions within  $\pm 6$  months of H<sub>2</sub> blocker prescription.
